# Supplementary material for: Metabolomics reveals diet-derived plant polyphenols accumulate in physiological bone
Source: PubMed Central journal article supplement (PMC6541599; doi:10.1038/s41598-019-44390-1), 2019-05-29
Supplement: 41598_2019_44390_MOESM1_ESM.pdf [file 41598_2019_44390_MOESM1_ESM.pdf]

## SUPPLEMENTARY INFORMATION

### Metabolomics reveals diet-derived plant polyphenols accumulate in physiological bone

Isabelle Alldritt,<sup>1</sup> Beatrice Whitham-Agut,<sup>1</sup> Miguel Sipin,<sup>1</sup> Jacob Studholme,<sup>1</sup> Angela Trentacoste,<sup>2</sup> Jennifer A. Tripp,<sup>3</sup> Maria Grazia Cappai,<sup>4</sup> Peter Ditchfield,<sup>5</sup> Thibaut Devière,<sup>5</sup> Robert E.M. Hedges,<sup>1,5</sup> and James S.O. McCullagh<sup>1\*</sup>

<sup>1</sup>Department of Chemistry, Mansfield Road, University of Oxford, Oxford OX1 3TA, UK.

<sup>2</sup>Institute of Archaeology, University of Oxford, Oxford OX1 2PG, UK.

<sup>3</sup>UCL Institute of Archaeology, Gordon Square, London WC1H 0PY, UK.

<sup>4</sup>Research Unit of Animal Nutrition, Department of Veterinary Medicine, University of Sassari, Italy, <sup>5</sup>Research Laboratory for Archaeology and the History of Art, University of Oxford, Dyson Perrins Building, South Parks Road, Oxford OX1 3QY, UK.

\*james.mccullagh@chem.ox.ac.uk

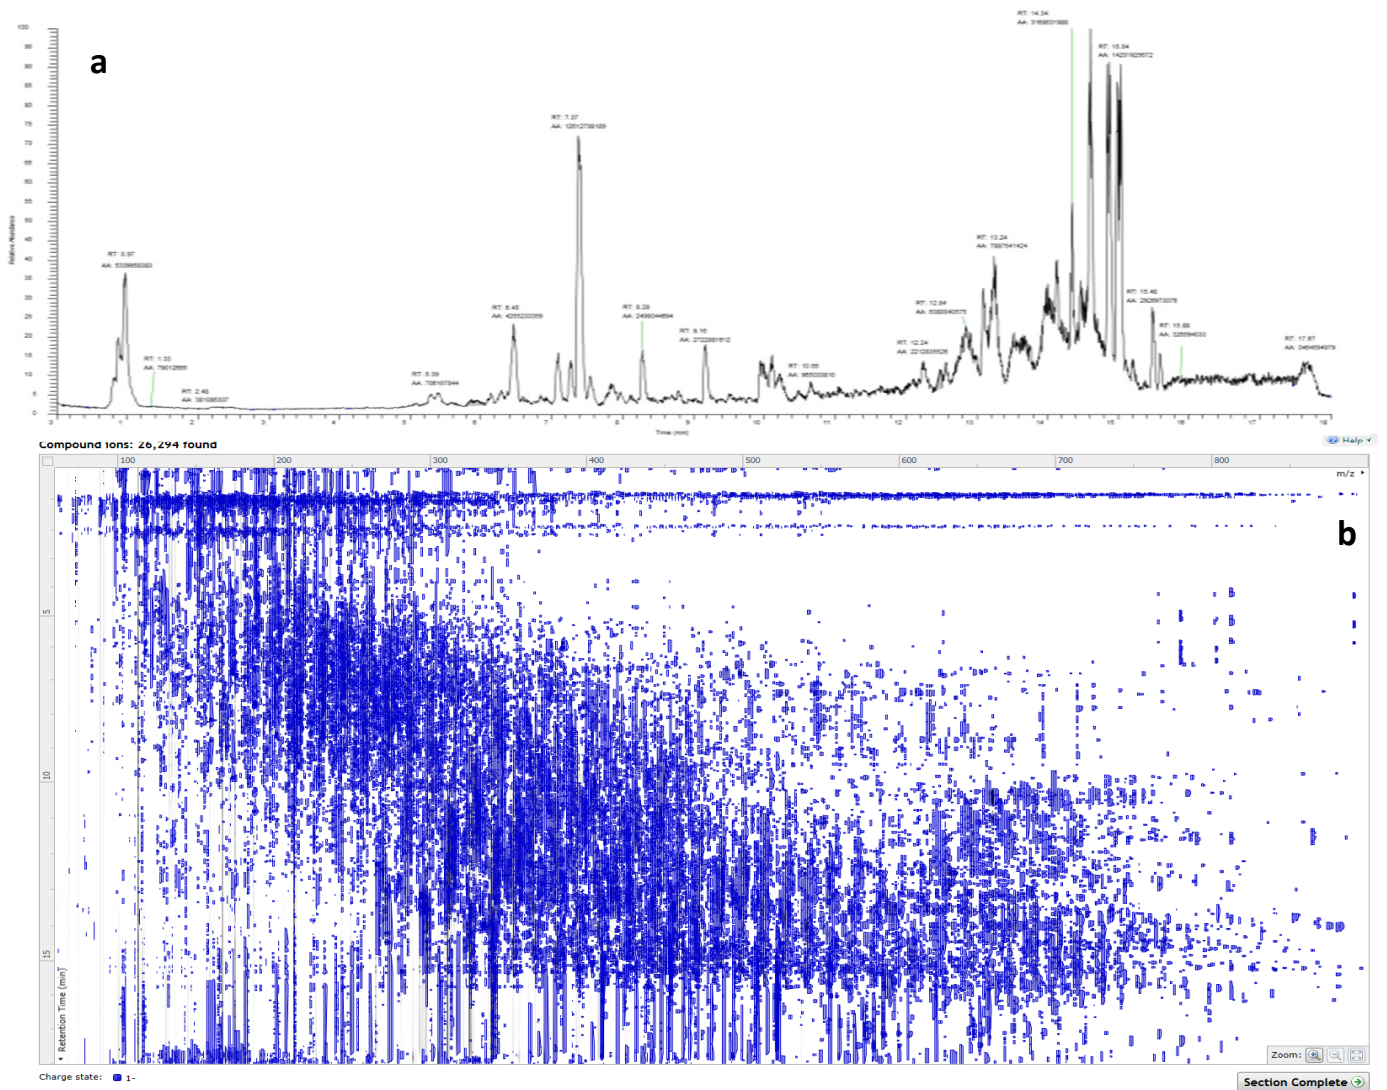

**Supplementary Figure 1 | Plant-derived compounds identified in pig bones by untargeted metabolite profiling. a,** Illustrative total ion chromatogram (TIC) for the untargeted LC-MS/MS analysis of Sardinian bone extract (60700116). **b,** Ion map from the untargeted LC-MS/MS analysis of Sardinian bone extract (60700116) shows distribution of over 26,000 compound features and their  $m/z$  values for untargeted analysis across the range  $m/z$  60-1000. **c,** Plant-derived compounds identified in modern pig bone samples.

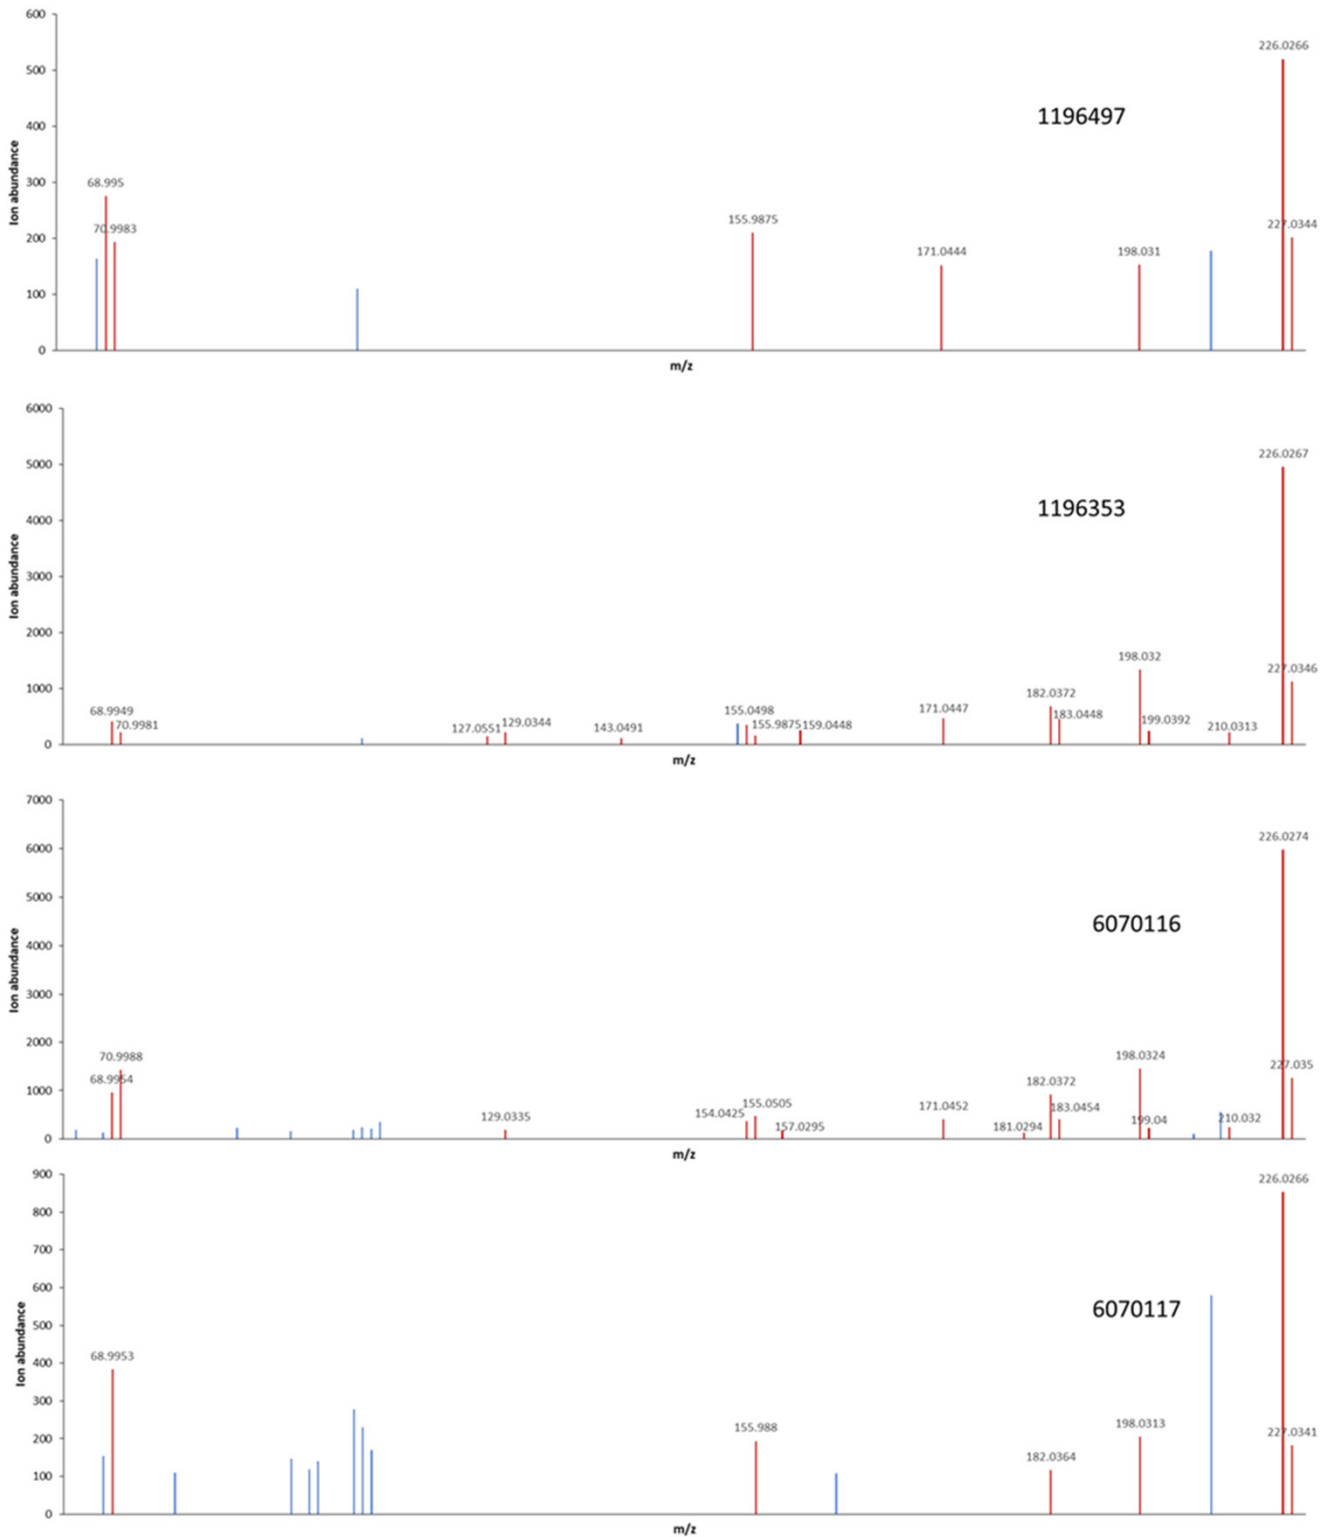

**Supplementary Figure 2** | Product ion spectra for the CID fragmentation of the precursor for urolithin A acid in each Sardinian bone extract (no evidence of UA in sample 6070125 as discussed in the manuscript). Individual product ion m/z values matching those from the tandem mass spectra of the authentic urolithin A standard are shown in red (<7ppm).

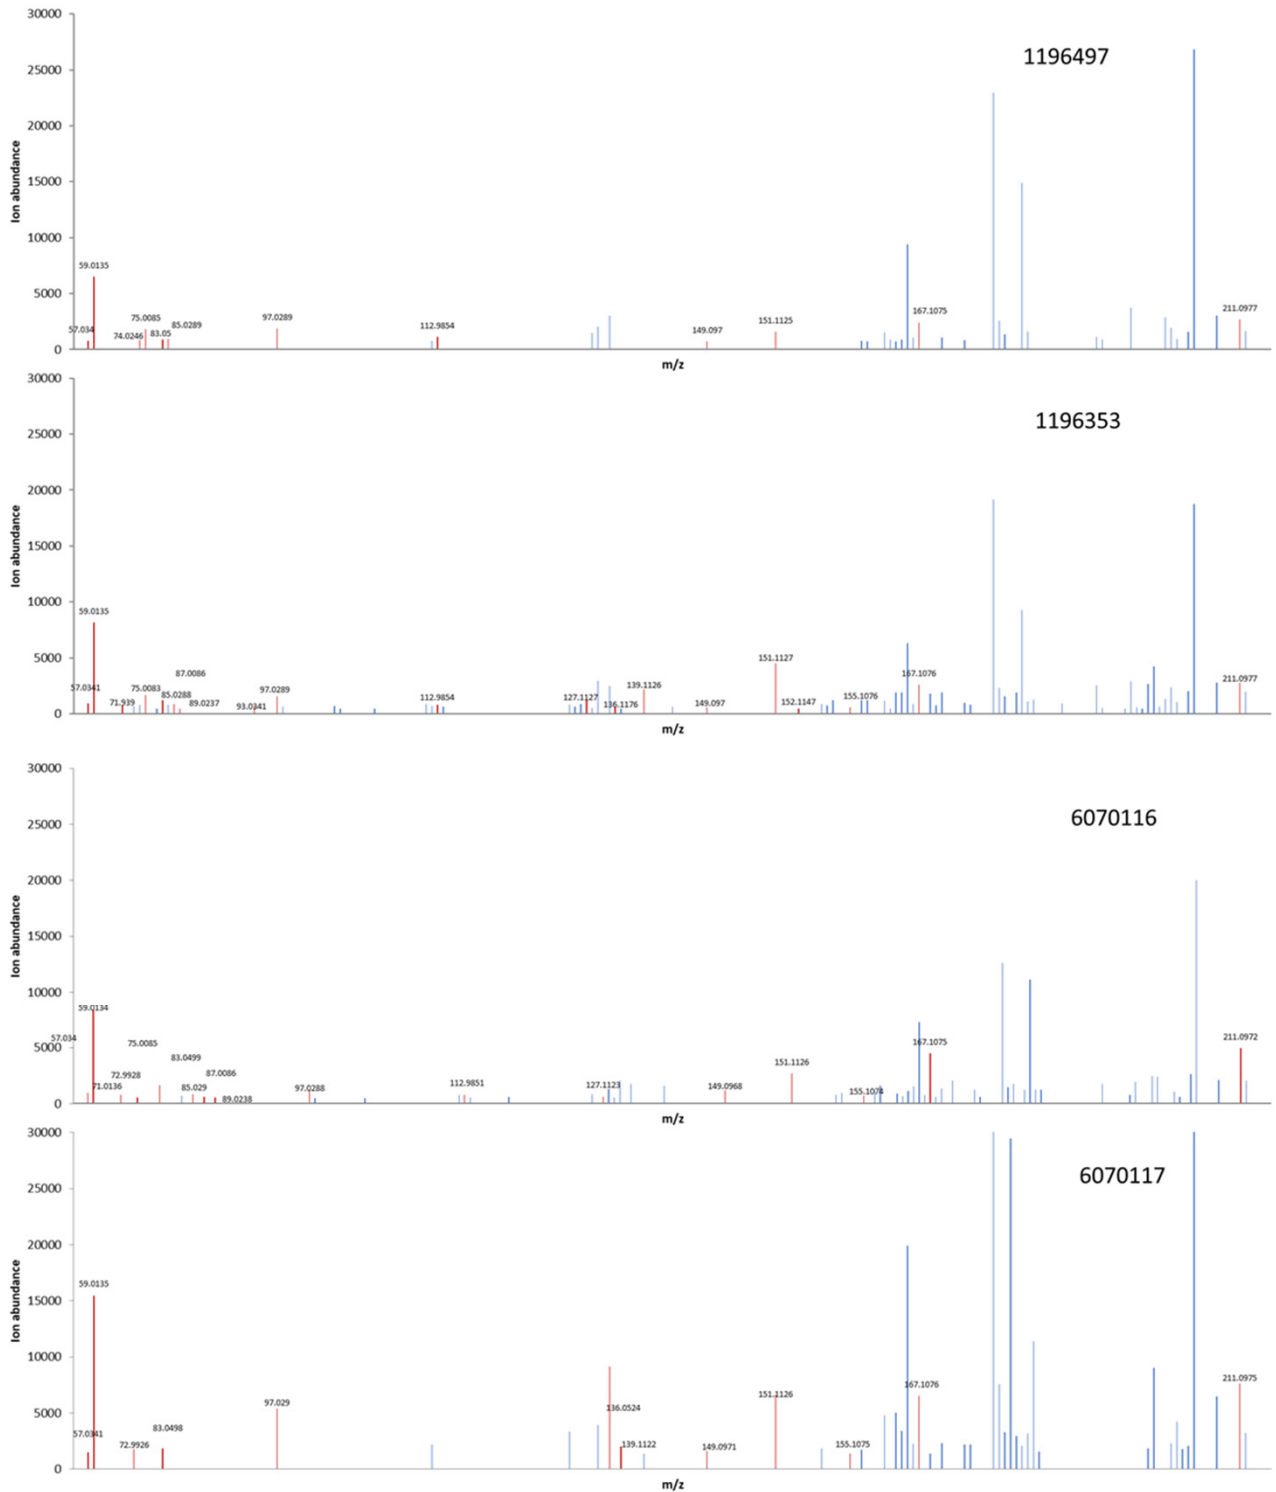

**Supplementary Figure 3 |** Product ion spectra for the CID fragmentation of the precursor for urolithin B acid in each Sardinian bone extract (no evidence of UB in sample 6070125 was found as discussed in the manuscript). Individual product ion m/z values matching those from the tandem mass spectra of the authentic urolithin B standard are shown in red (<12ppm). A significant number of matched peaks were identified although these represented a lower percentage than for urolithin A. The precursor ion m/z window was 1.5 dalton: Given the significant number of compound features (>18,000) some isobaric compounds ion or co-eluting species within the 1.5 dalton window, could lead to some 'contamination' of the product ion spectra. (<10ppm).

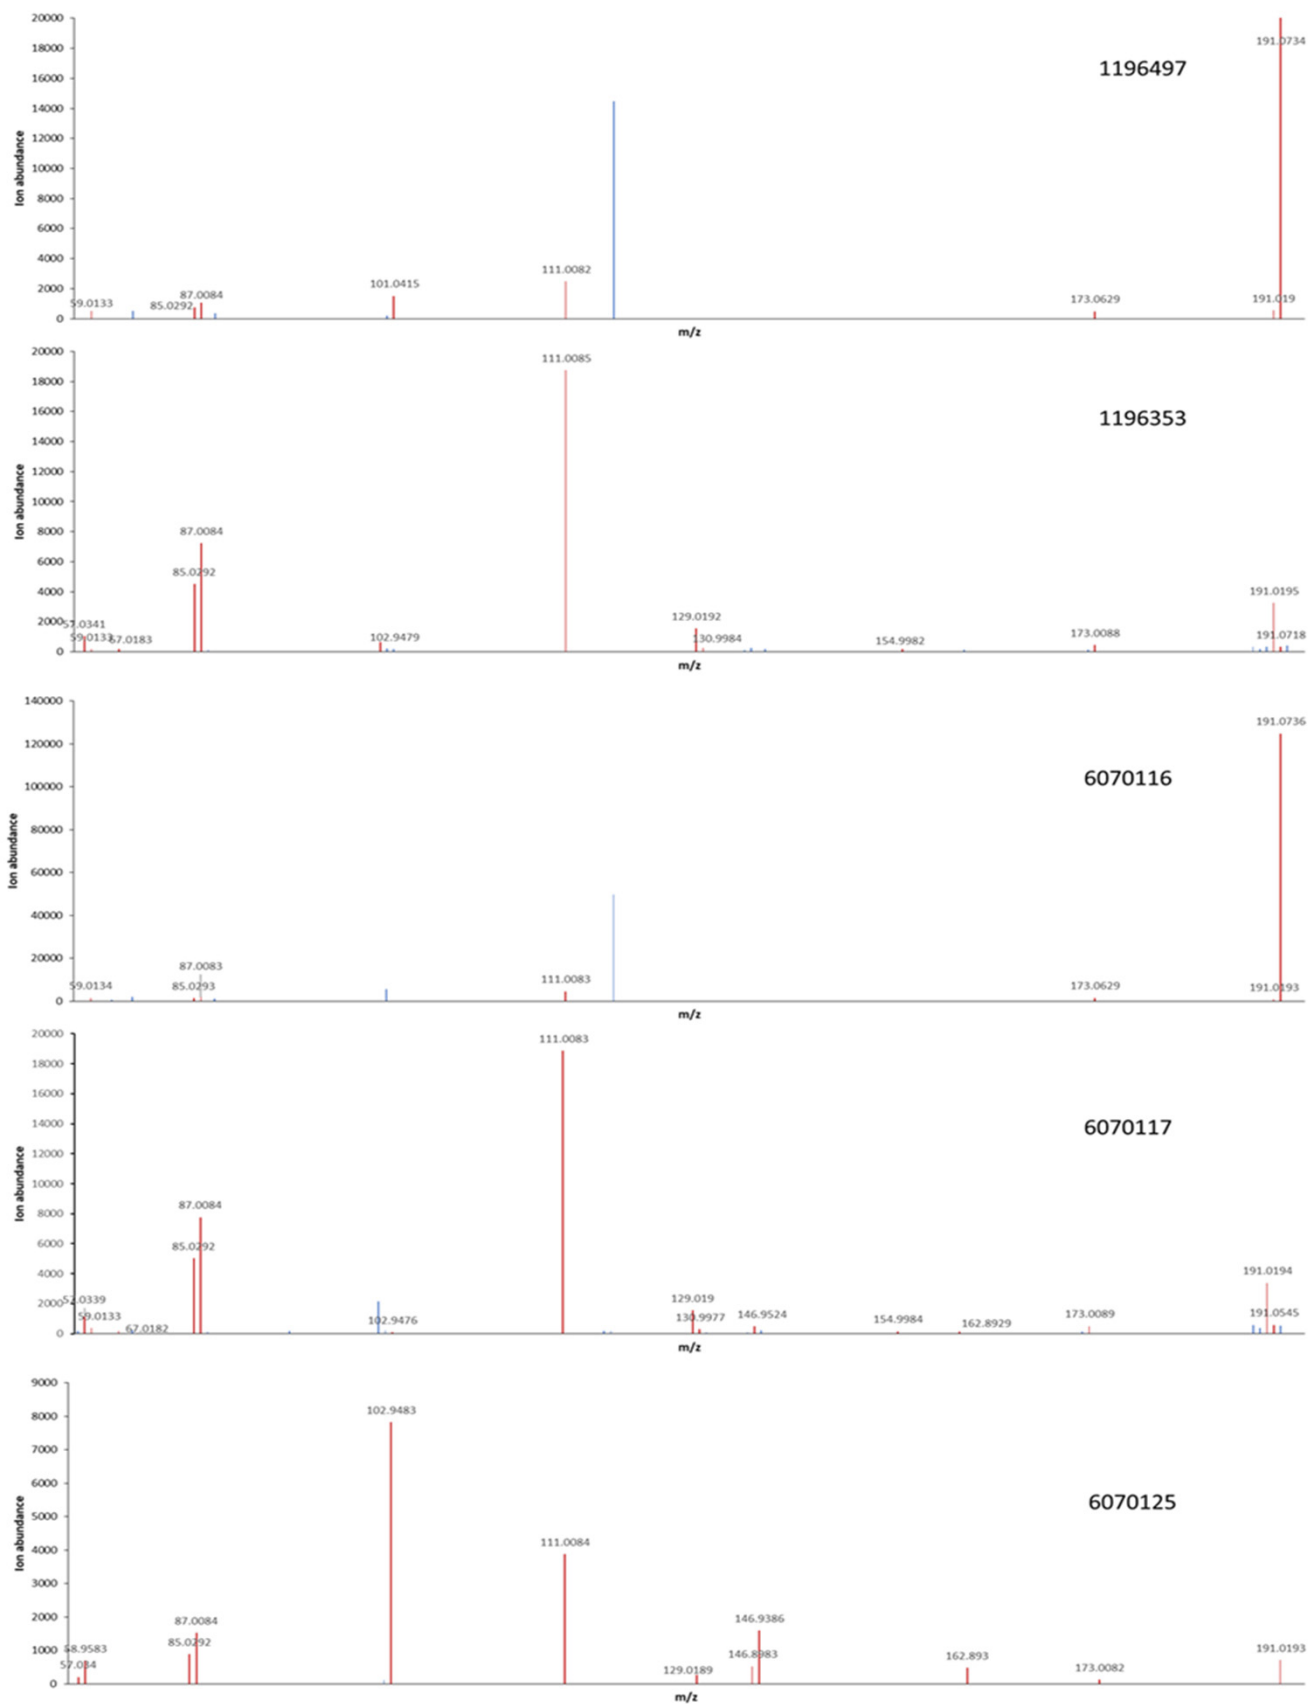

**Supplementary Figure 4** | Product ion spectra for the CID fragmentation of the precursor for quinic acid in each Sardinian bone extract. Individual product ion m/z values matching those from the tandem mass spectra of the authentic quinic acid standard are shown in red (<8ppm).

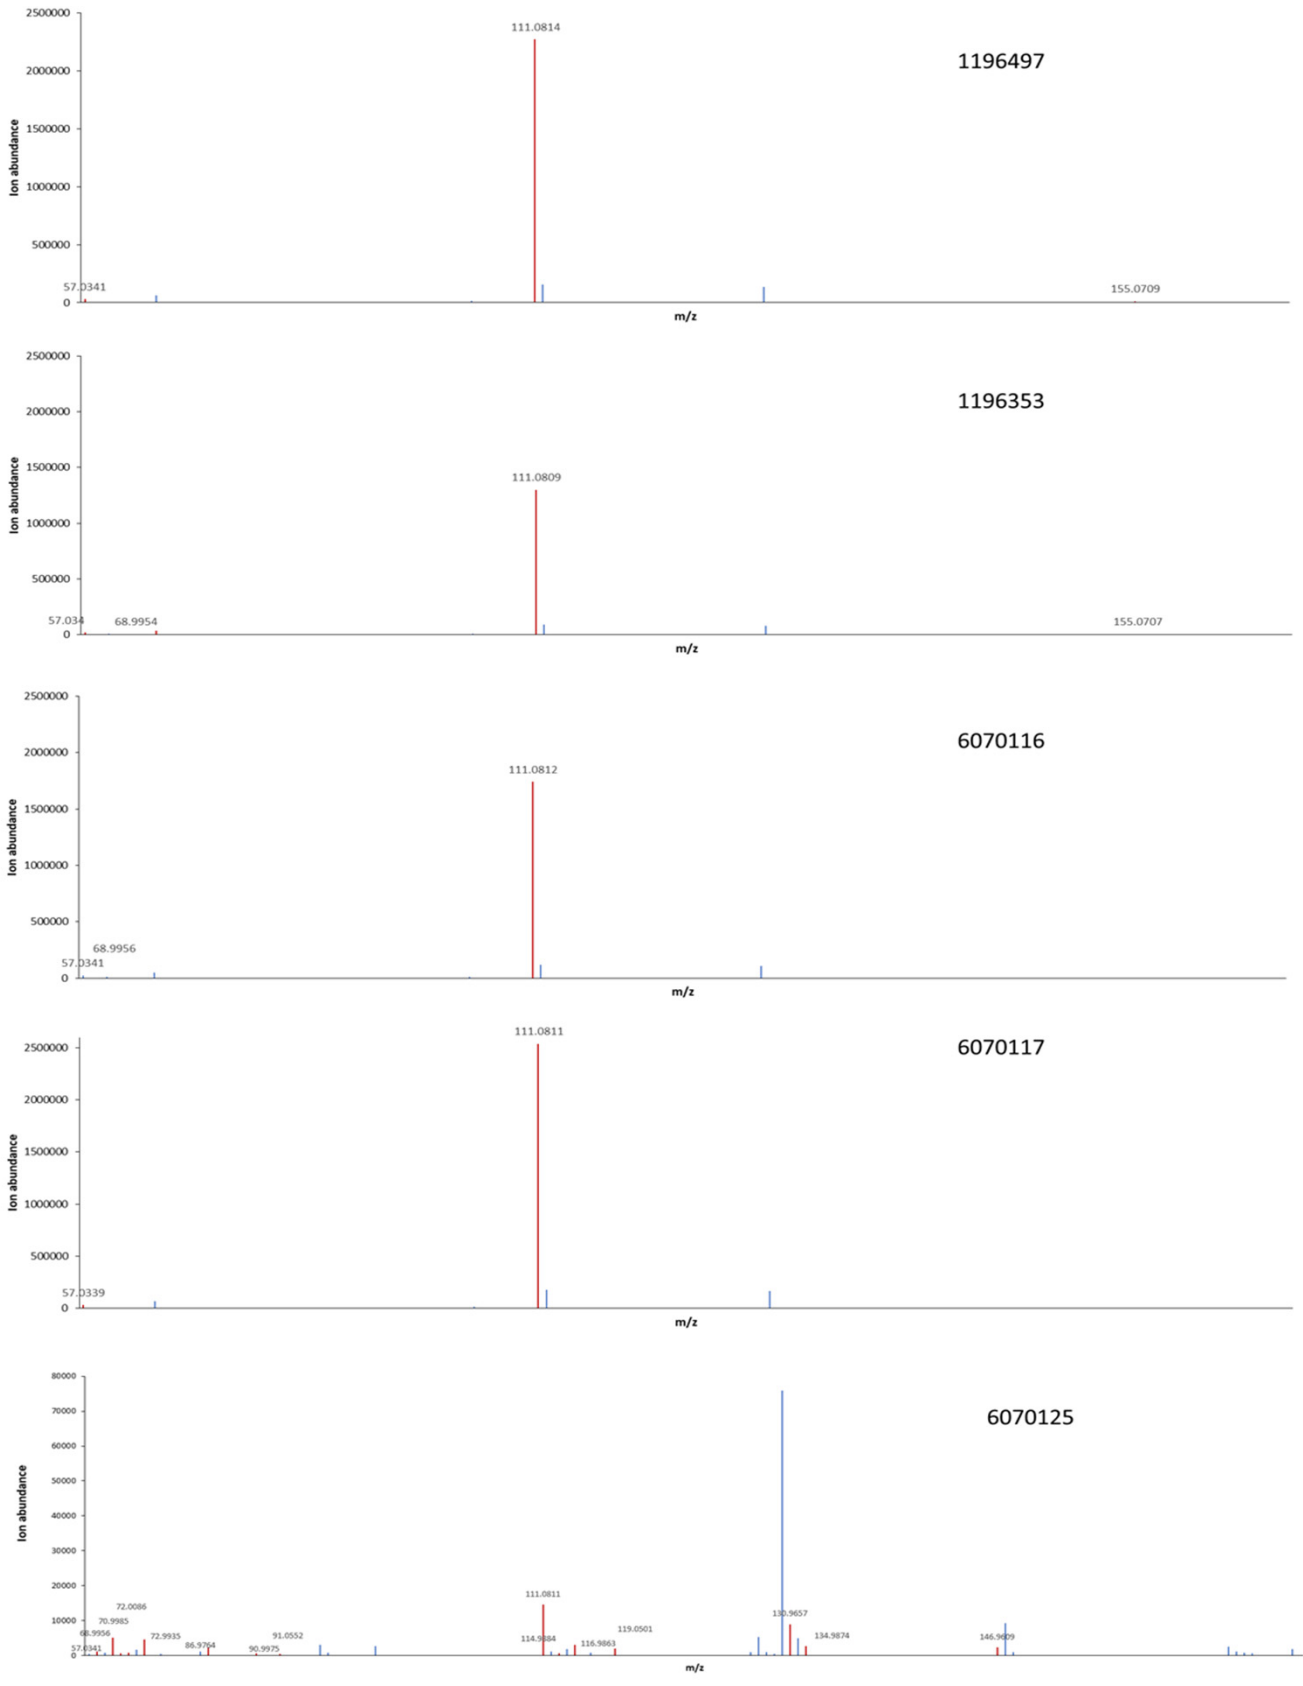

**Supplementary Figure 5 |** Product ion spectra for the CID fragmentation of the precursor for p-coumaric acid in each Sardinian bone extract. Individual product ion m/z values matching those from the tandem mass spectra of the authentic p-coumaric acid standard are shown in red (<6ppm).

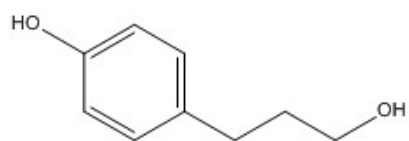

**1** 2-(4-hydroxyphenyl)ethanol

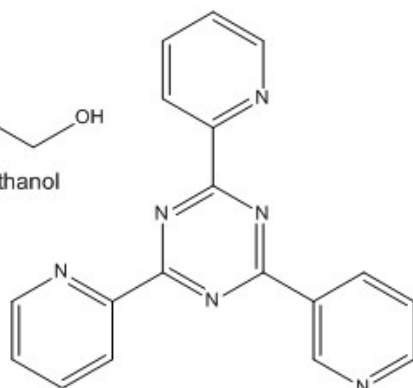

2,4,6-Tris(2-pyridyl)-s-triazine

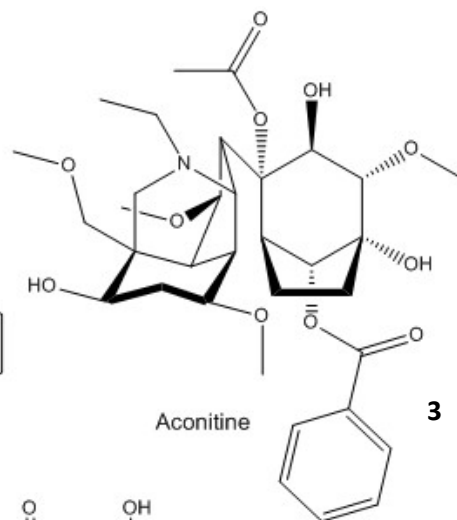

Aconitine

**3**

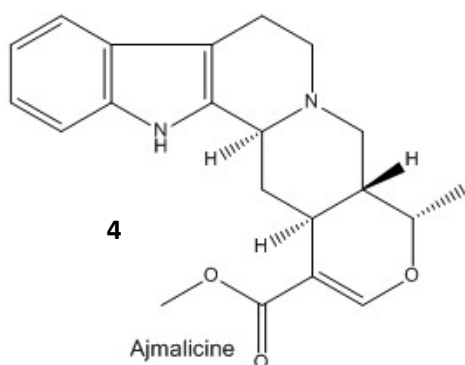

**4**

Ajmalicine

**2**

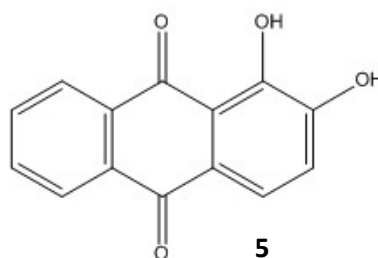

**5**

Alizarin

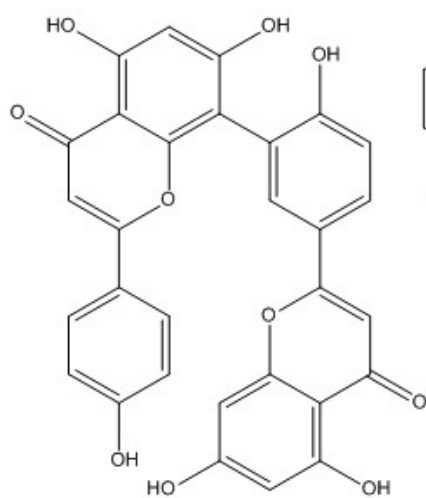

**6** Amentoflavone

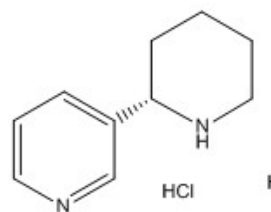

HCl

Anabasine hydrochloride

**7**

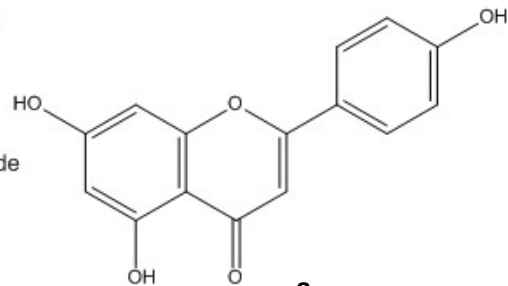

Apigenin

**8**

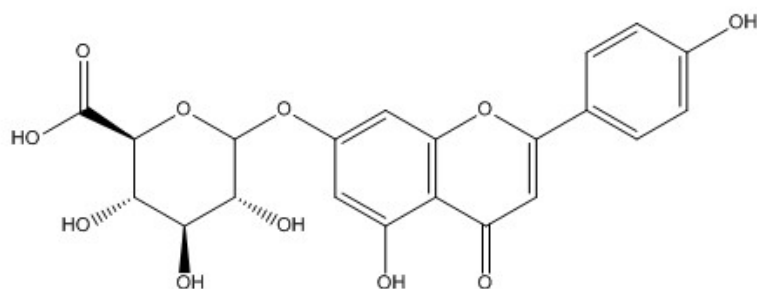

**9**

Apigenin-7-O-glucuronide

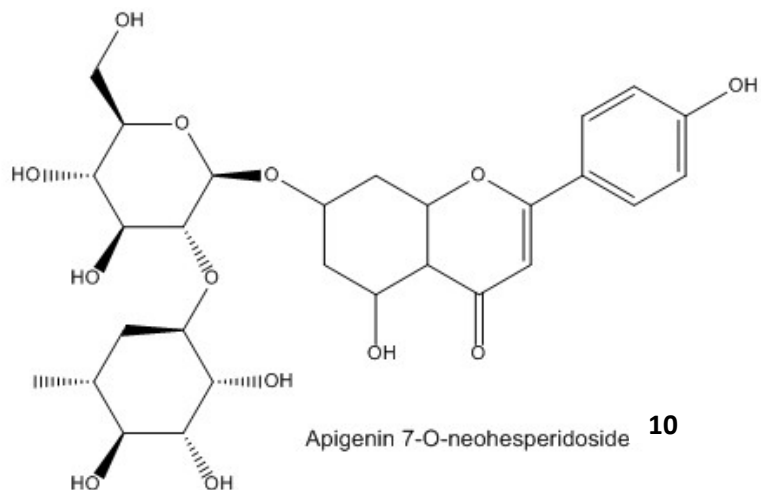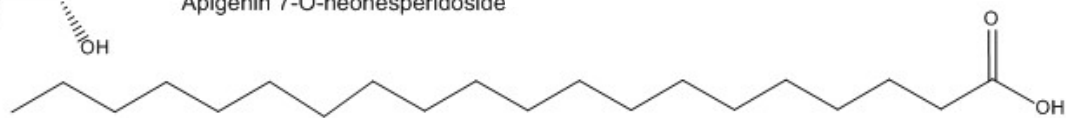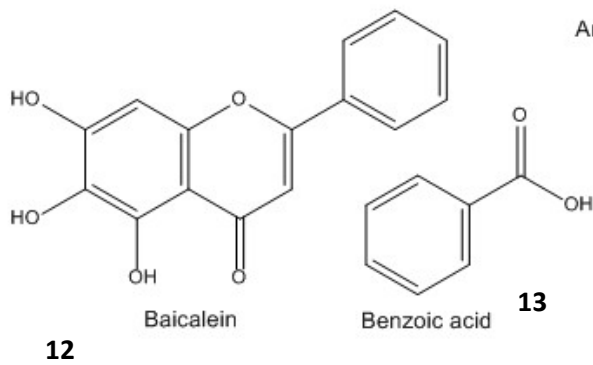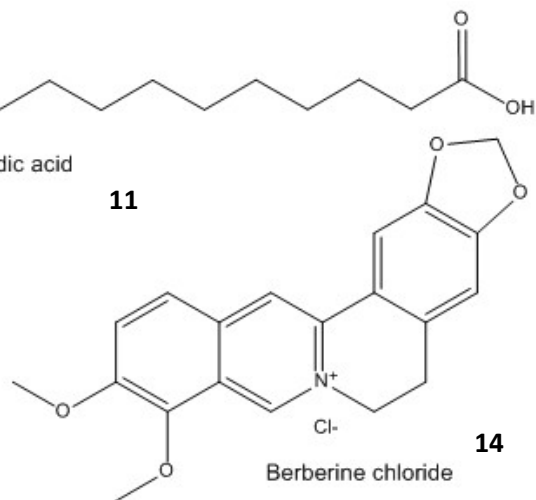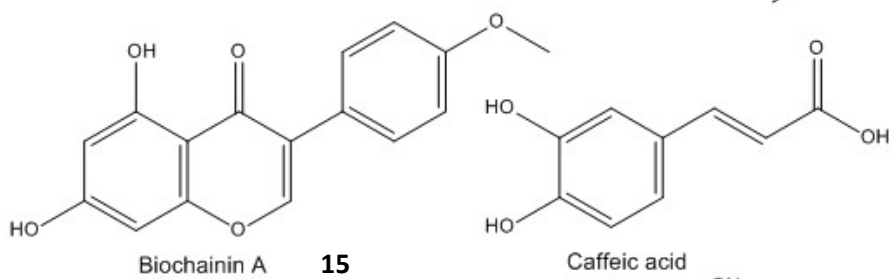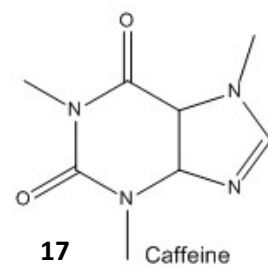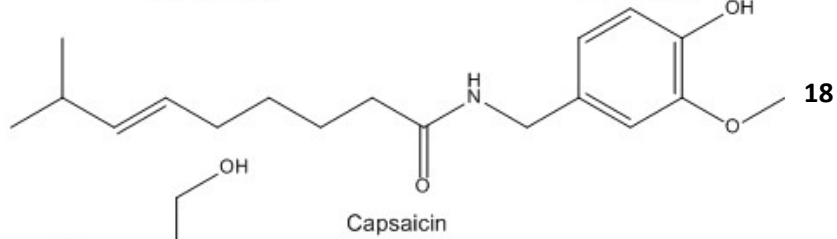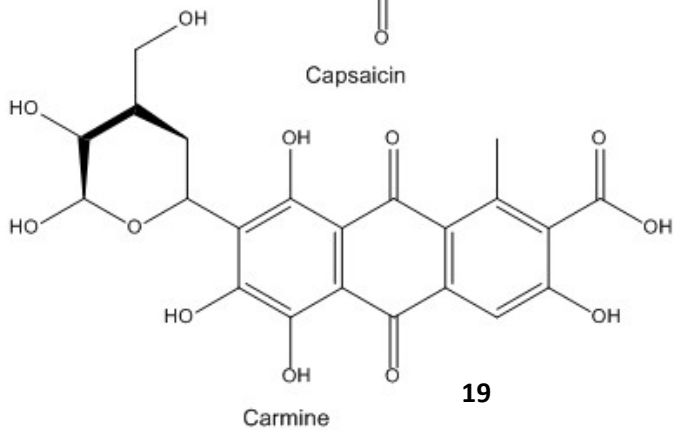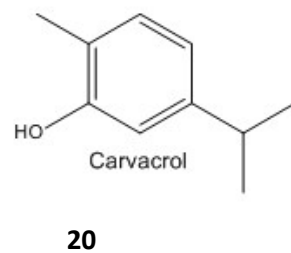



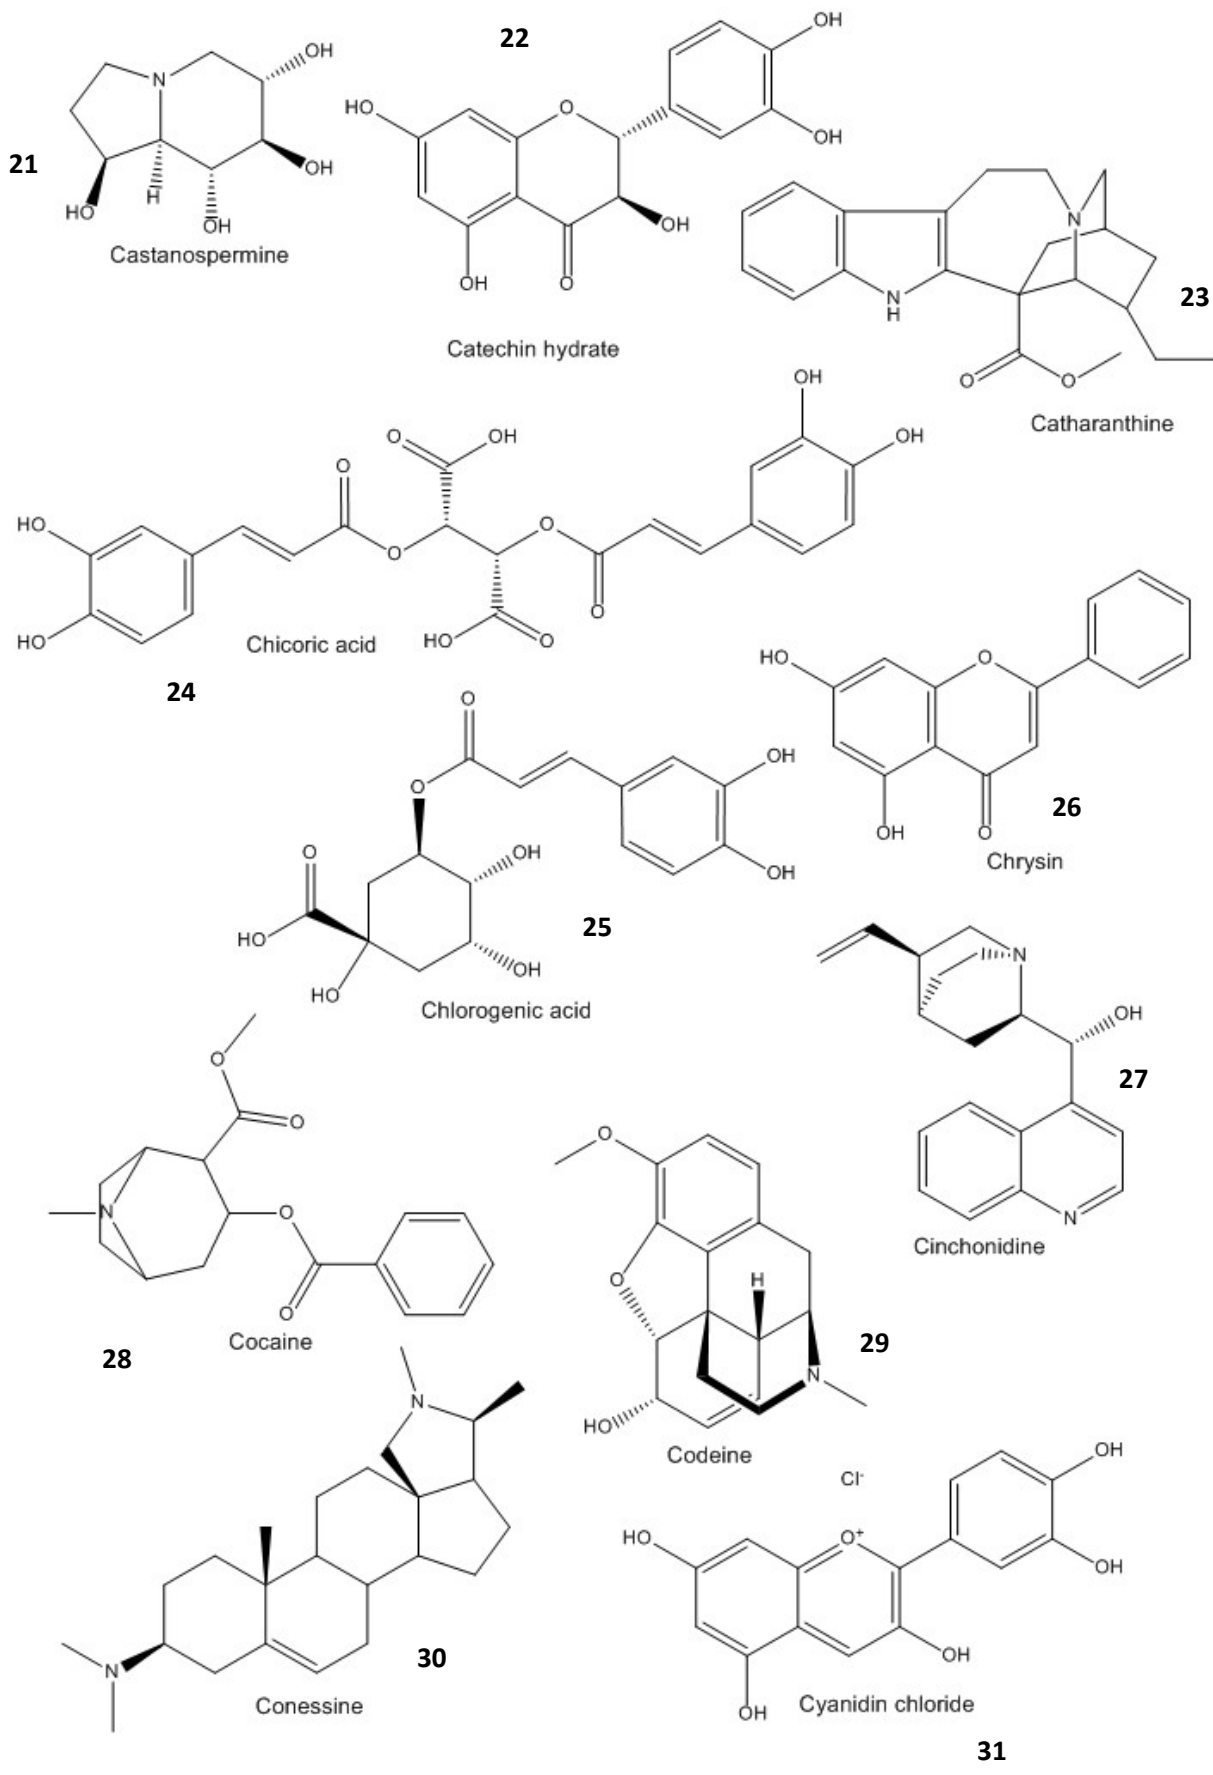

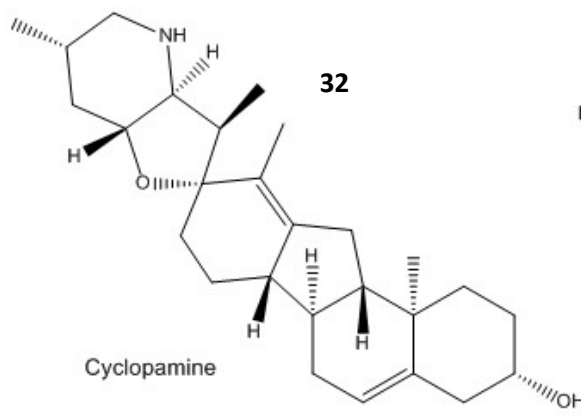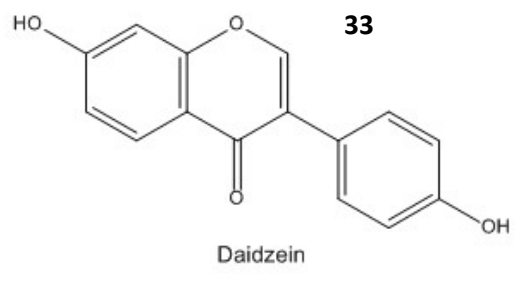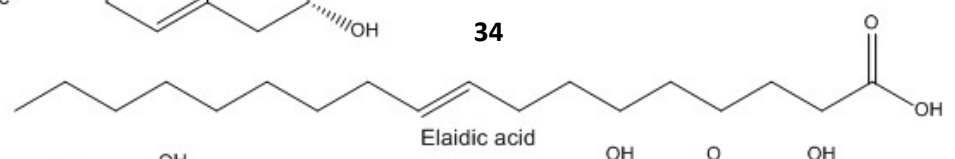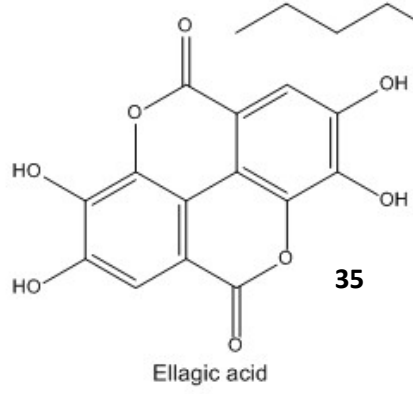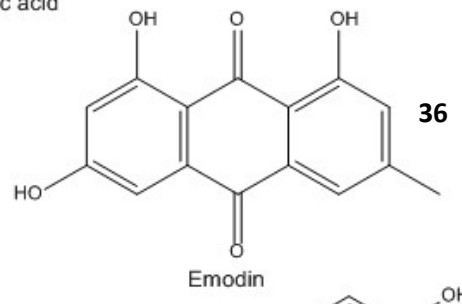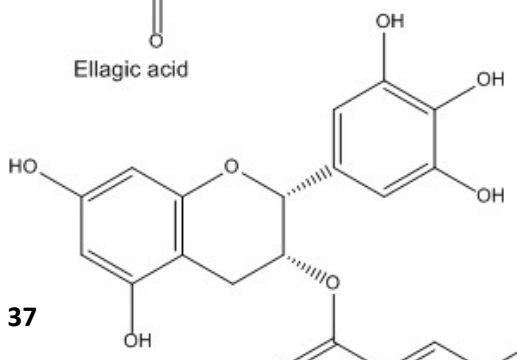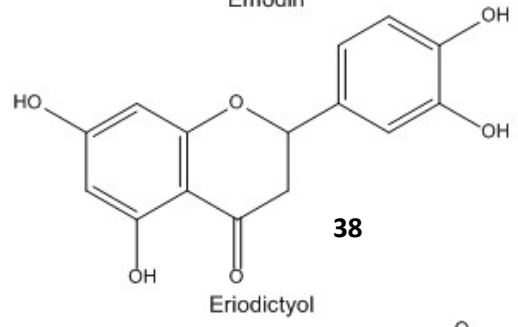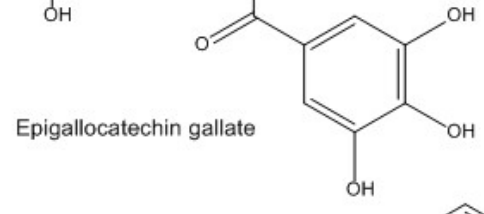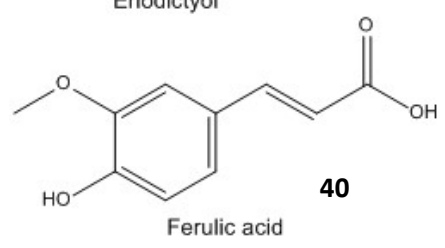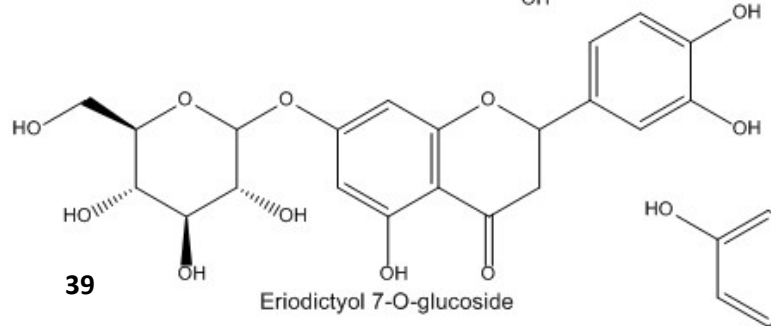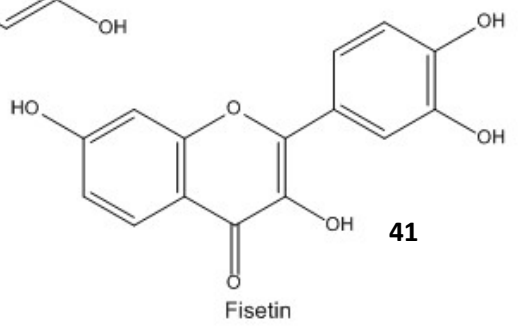

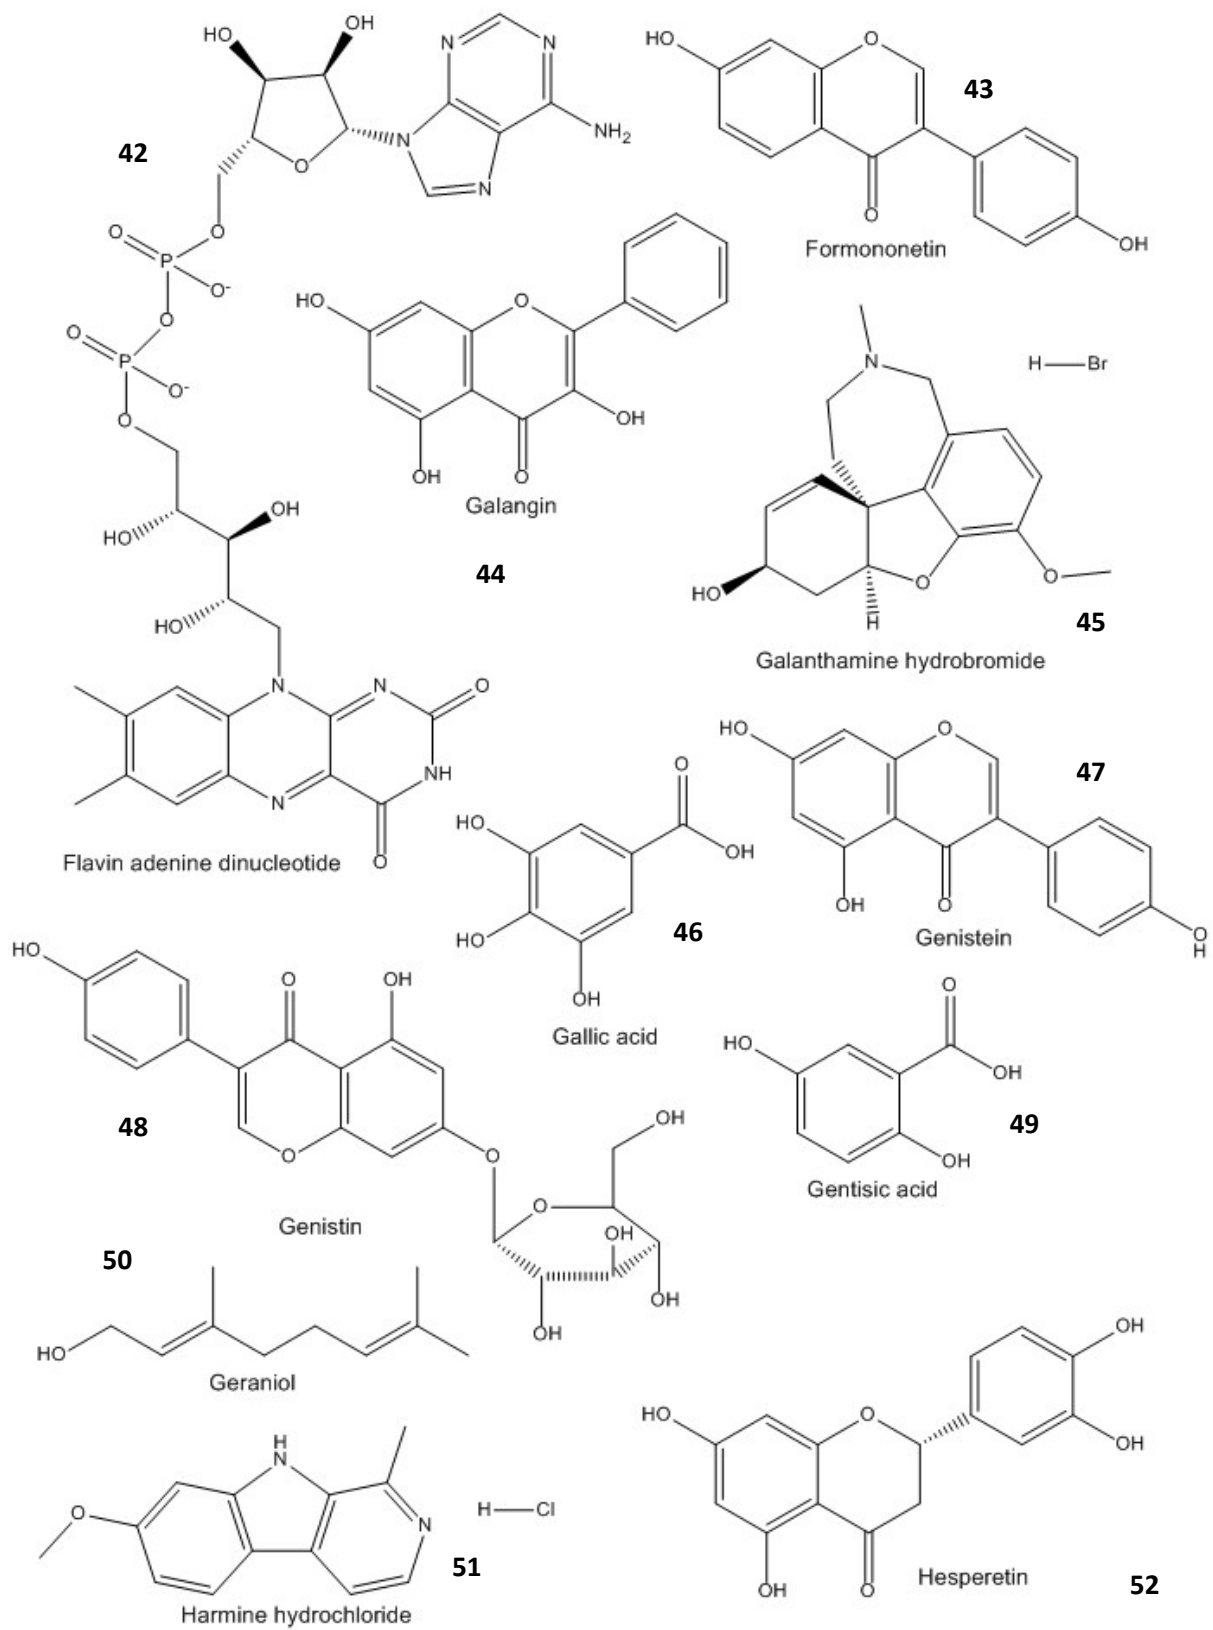

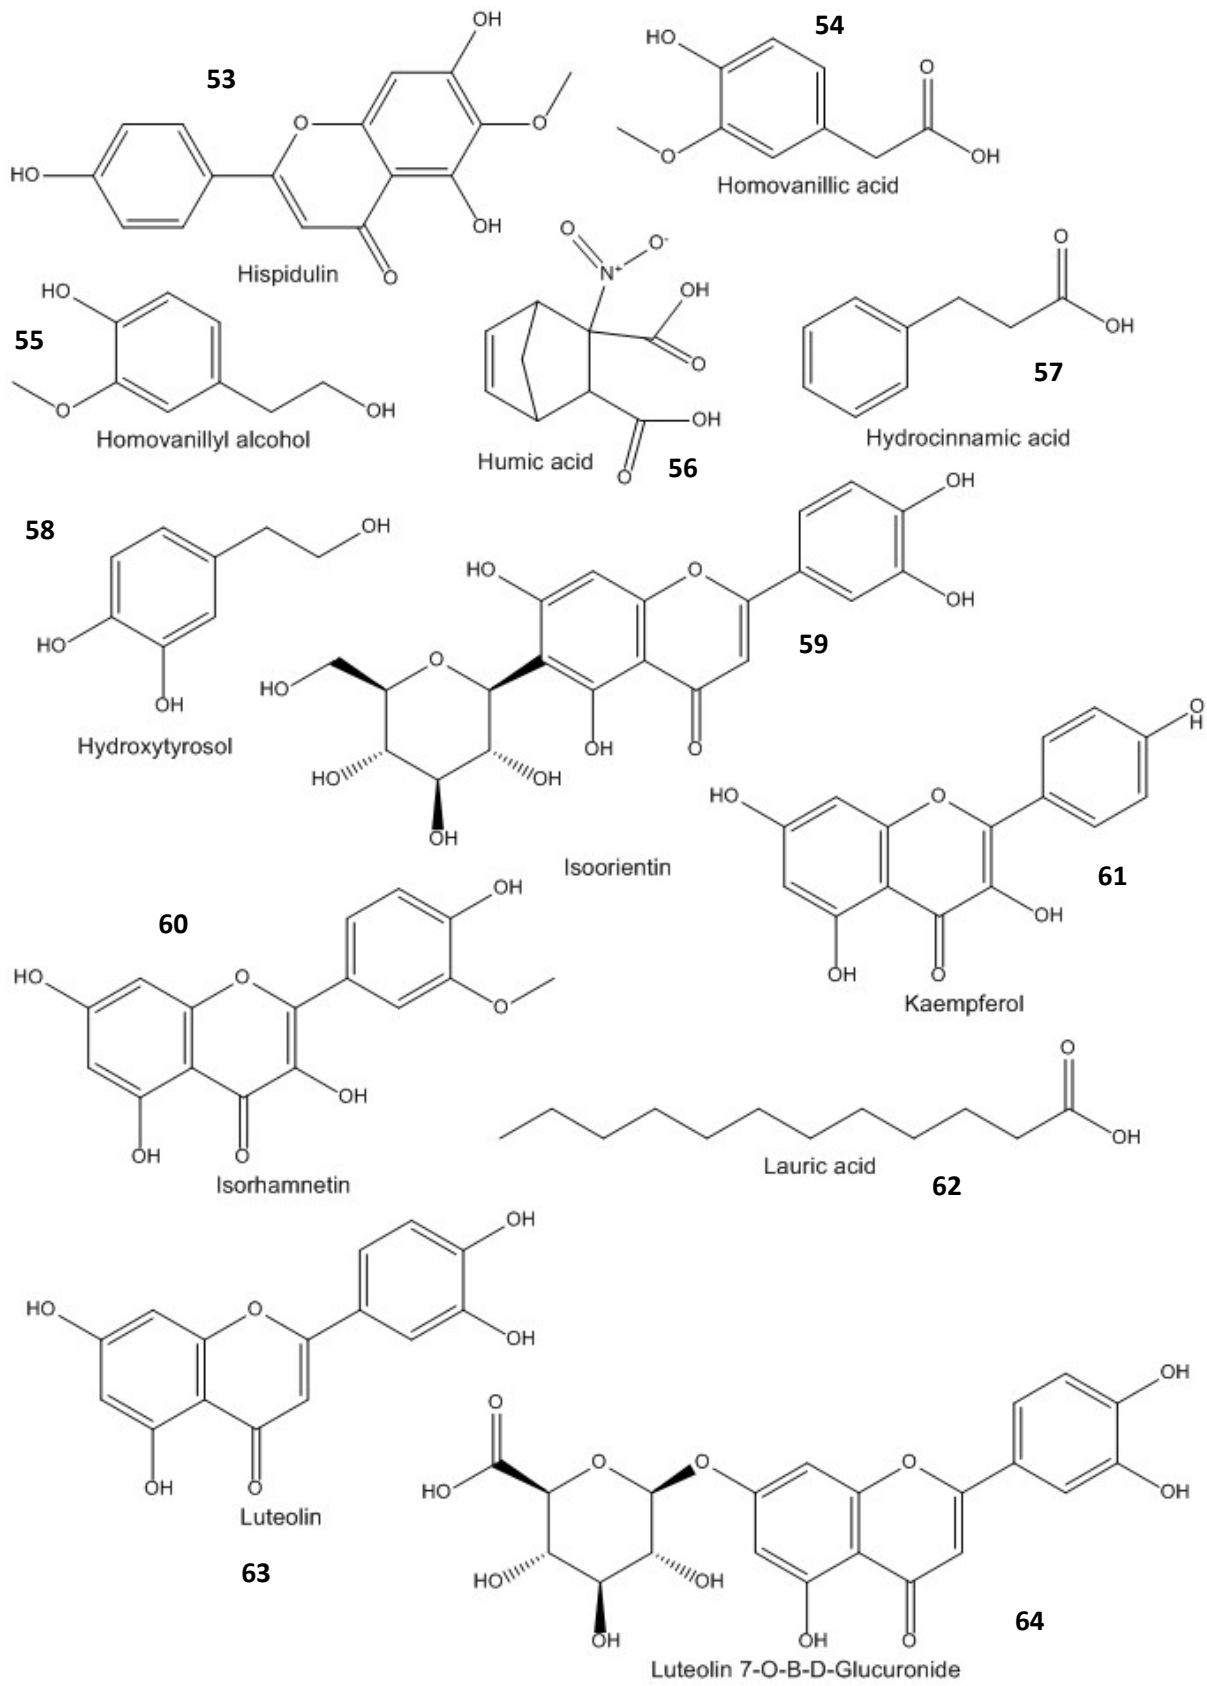

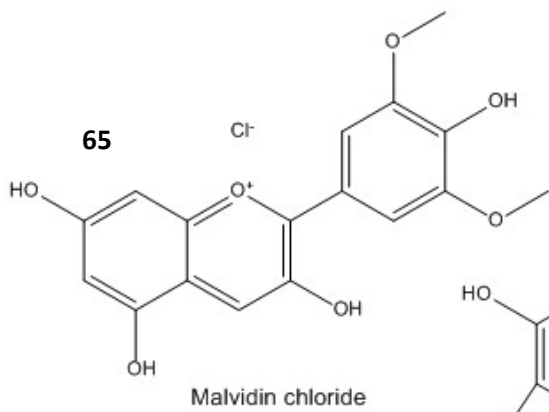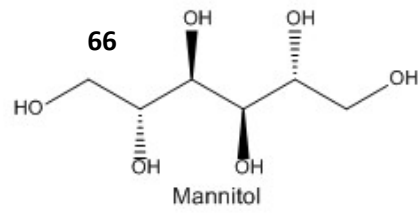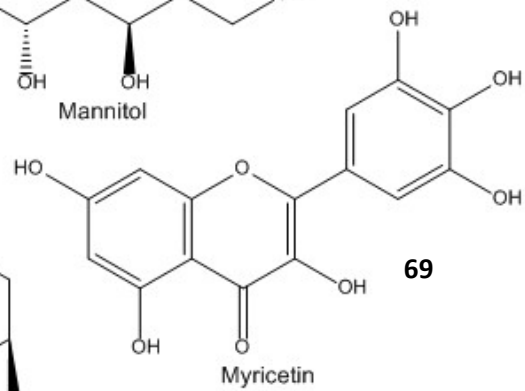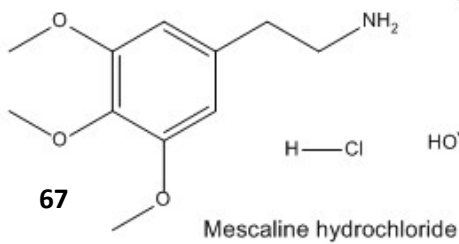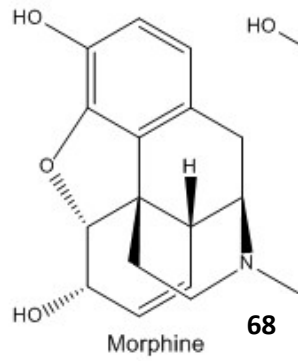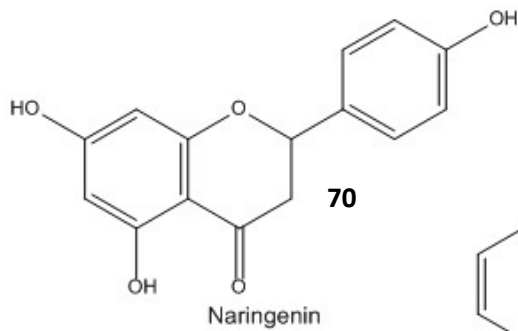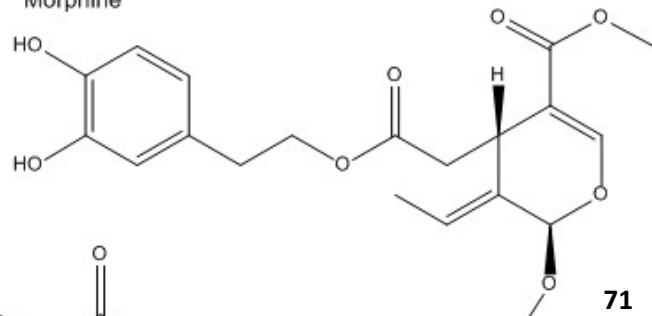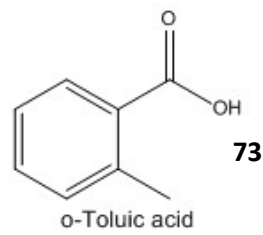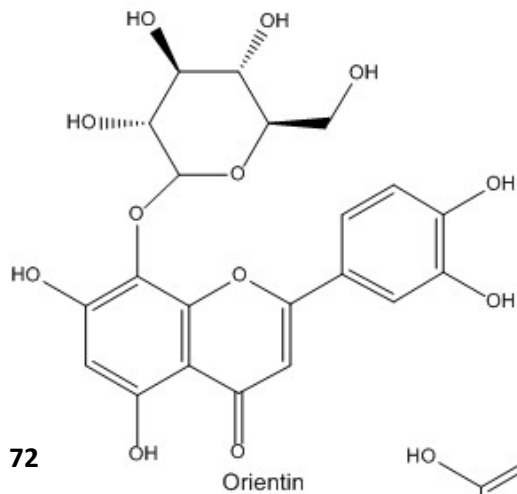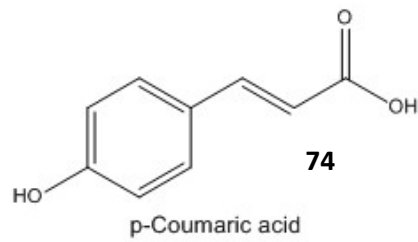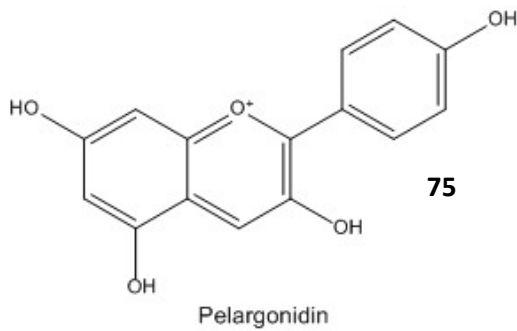

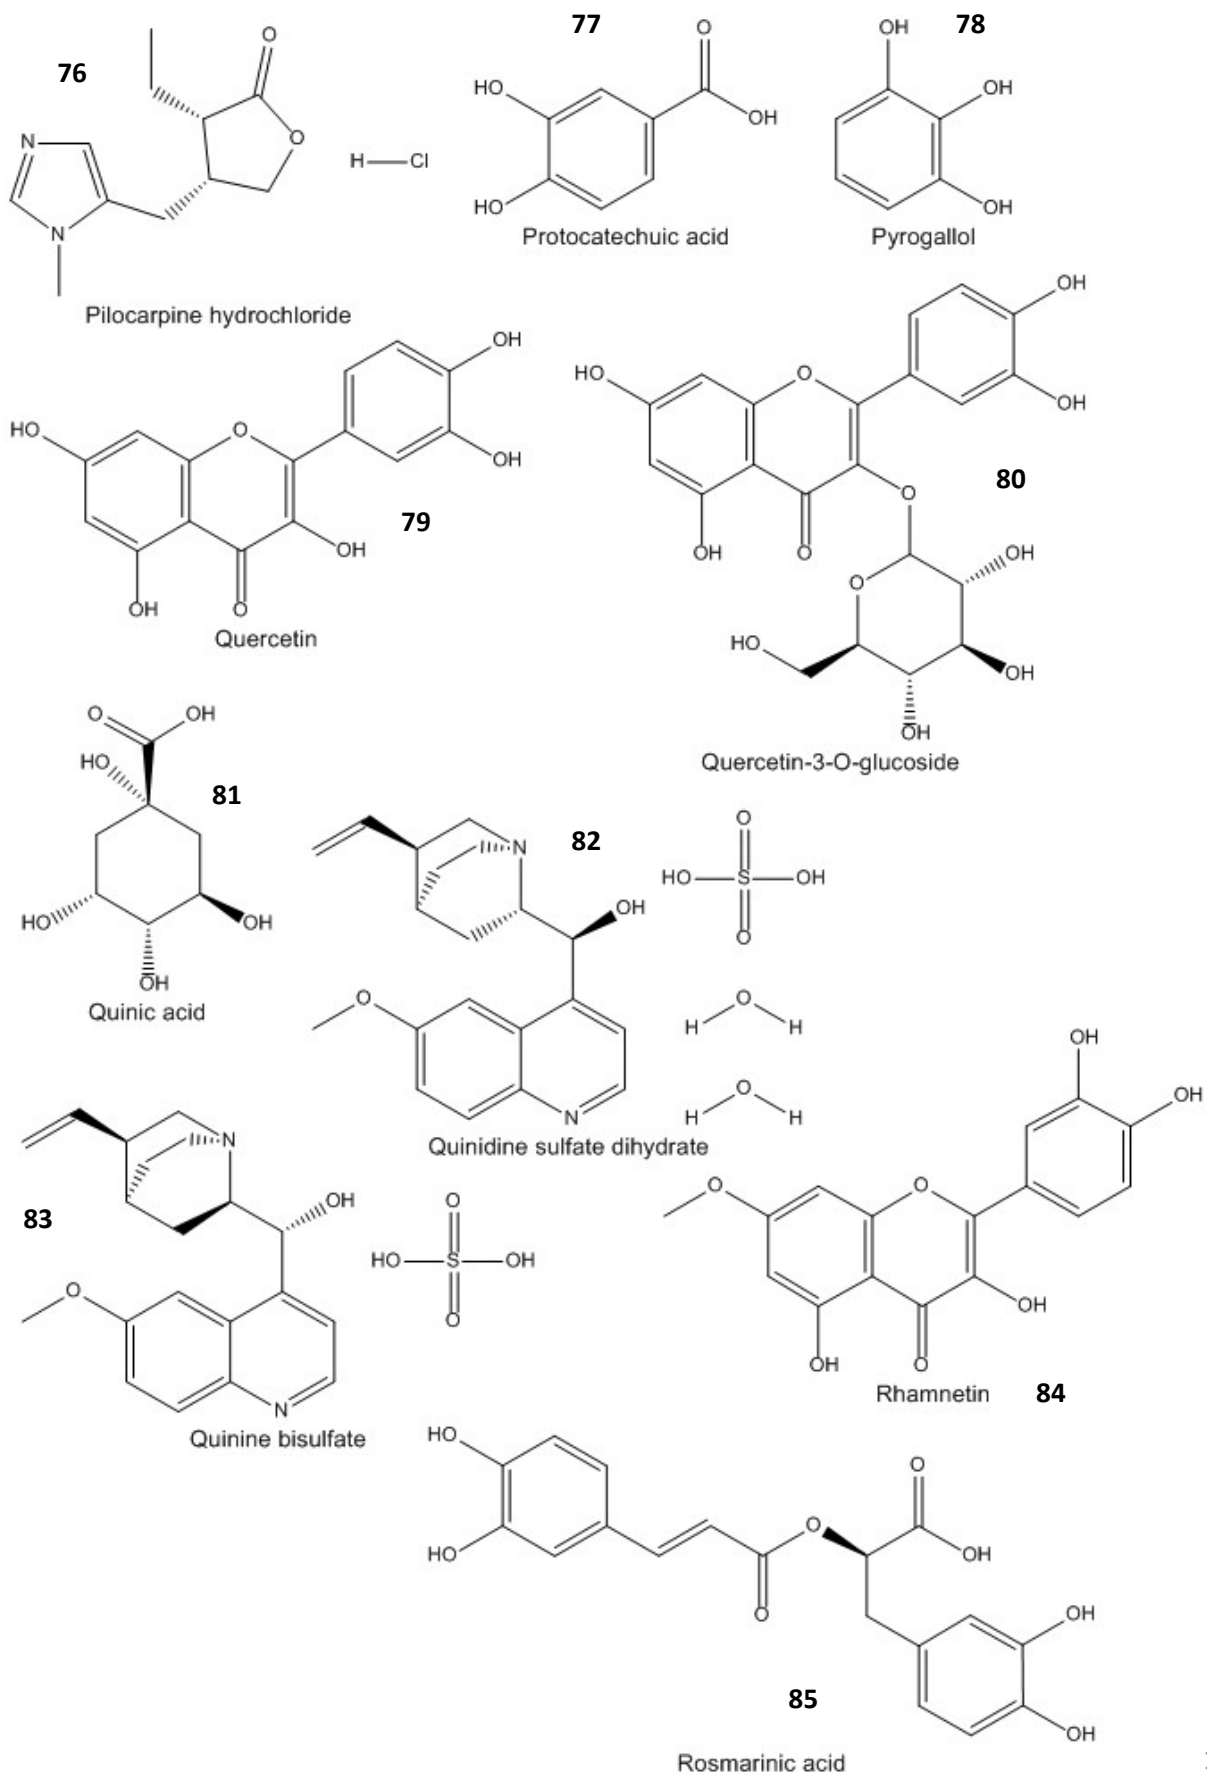



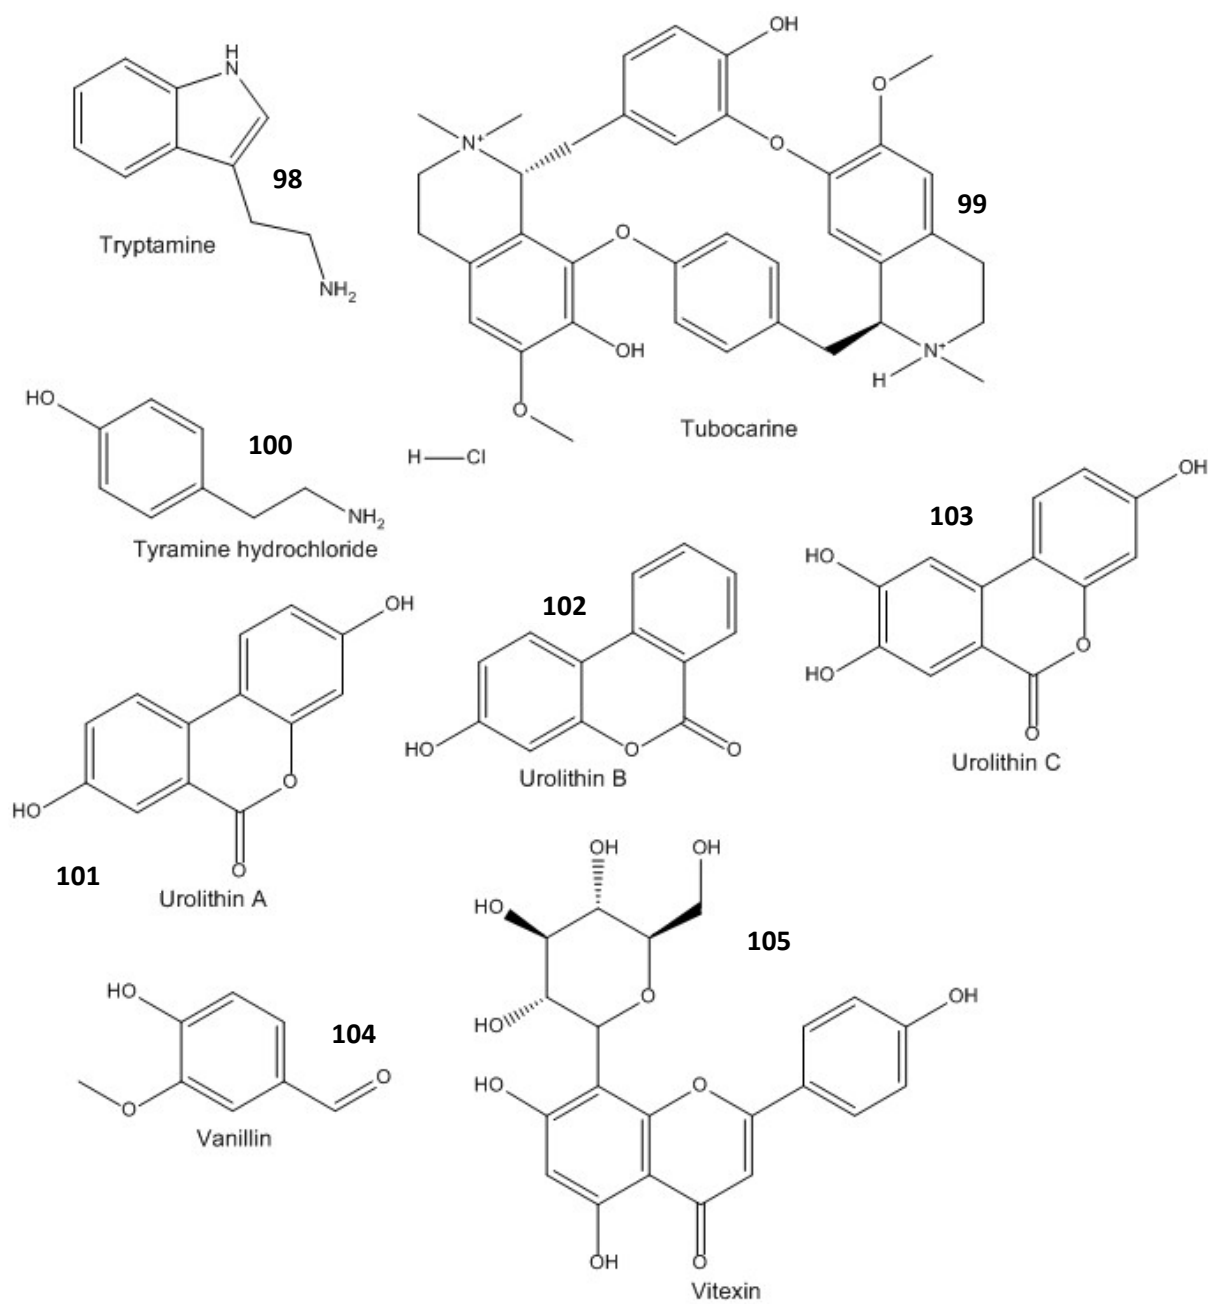

**Supplementary Figure 6 | Polyphenols show a range of affinities for hydroxyapatite (HAP) linked to chemical structure.** Chemical structure for 105 polyphenolic compounds used in binding studies.



| Bone sample | Species    | Animal breed                                 | Feeding study | Notes                                                                         |
|-------------|------------|----------------------------------------------|---------------|-------------------------------------------------------------------------------|
| 6070116     | Sus scrofa | Duroc sires on Large White X German Landrace | Yes           | Part of feeding experiment with controlled acorn supplementation of the diet. |
| 6070125     | Sus scrofa | Duroc sires on Large White X German Landrace | Yes           | Part of feeding experiment with controlled acorn supplementation of the diet. |
| 6070115     | Sus scrofa | Duroc sires on Large White X German Landrace | Yes           | Part of feeding experiment with controlled acorn supplementation of the diet. |
| 1196353     | Sus scrofa | Duroc sires on Large White X German Landrace | Yes           | Part of feeding experiment with controlled acorn supplementation of the diet. |
| 1196497     | Sus scrofa | Duroc sires on Large White X German Landrace | Yes           | Part of feeding experiment with controlled acorn supplementation of the diet. |
| PC-1        | Sus scrofa | Domestic pig of unknown breed.               | No            | Used as a positive control for dietary acorn supplementation.                 |
| NC-1        | Sus scrofa | Domestic pig of unknown breed.               | No            | Used as a negative control for dietary acorn supplementation.                 |

**Supplementary Table 1 |** Pigs used in the Sardinian acorn-supplement feeding study.

| No. | Compound ID                      | RT (min.) | [M-H] <sup>-</sup> | Formula       |
|-----|----------------------------------|-----------|--------------------|---------------|
| 1   | 2-(4-hydroxyphenyl)ethanol       | 5.07      | 137.0601           | C8H10O2       |
| 2   | 2,4,6-Tris(2-pyridyl)-s-triazine | 6.58      | 311.1043           | C18H12N6      |
| 3   | Aconitine                        | 7.27      | 644.3064           | C34H47NO11    |
| 4   | Ajmalicine                       | 4.90      | 351.1701           | C21H24N2O3    |
| 5   | Alizarin                         | 3.54      | 239.0350           | C14H8O4       |
| 6   | Amentoflavone                    | 8.17      | 537.0820           | C30H18O10     |
| 7   | Anabesine Hydrochloride          | 16.81     | 161.1072           | C10H14N2      |
| 8   | Apigenin                         | 13.3      | 269.0448           | C15H10O5      |
| 9   | Apigenin-7-O-Glucuronide         | 6.85      | 445.0764           | C21H18O11     |
| 10  | Apigenin-7-O-neohesperidoside    | 5.33      | 577.1556           | C27H30O14     |
| 11  | Arachidic Acid                   | 13.3      | 311.2954           | C20H40O2      |
| 12  | Baicalein                        | 7.40      | 269.0448           | C15H10O5      |
| 13  | Benzoic acid                     | 5.27      | 121.0288           | C7H6O2        |
| 14  | Berberine Chloride               | 5.11      | 370.0850           | C20H18NO4Cl   |
| 15  | Biochanin A                      | 8.41      | 283.0599           | C16H12O5      |
| 16  | Caffeic acid                     | 5.32      | 179.0343           | C9H8O4        |
| 17  | Caffeine                         | 7.53      | 193.0729           | C8H10N4O2     |
| 18  | Capsaicin                        | 8.71      | 304.1911           | C18H27NO3     |
| 19  | Carmine                          | 2.30      | 491.0831           | C22H20O13     |
| 20  | Carvacrol                        | 11.9      | 149.0959           | C10H14O       |
| 21  | Castanospermine                  | 0.72      | 188.0916           | C8H15NO4      |
| 22  | Catechin hydrate                 | 4.97      | 289.0710           | C15H14O6      |
| 23  | Catharanthine                    | 6.10      | 335.1752           | C21H24N2O2    |
| 24  | Chicoric acid                    | 4.19      | 473.0718           | C22H18O12     |
| 25  | Chlorogenic acid                 | 3.50      | 353.0871           | C16H18O9      |
| 26  | Chrysin                          | 8.48      | 253.0499           | C15H10O4      |
| 27  | Cinchonidine                     | 8.69      | 293.1647           | C19H22N2O     |
| 28  | Cocaine                          | 5.39      | 302.1385           | C17H21NO4     |
| 29  | Codeine                          | 6.55      | 298.1436           | C18H21NO3     |
| 30  | Conessine                        | 4.87      | 355.3106           | C24H40N2      |
| 31  | Cyanidin Chloride                | 5.65      | 321.0159           | C15H11O6      |
| 32  | Cycloamine                       | 7.78      | 410.3052           | C27H41NO2     |
| 33  | Daidzein                         | 6.02      | 253.0499           | C15H10O4      |
| 34  | Elaidic Acid                     | 12.9      | 281.2484           | C18H34O2      |
| 35  | Ellagic acid                     | 5.33      | 300.9983           | C14H6O8       |
| 36  | Emodin                           | 8.66      | 269.0454           | C15H10O5      |
| 37  | Epigallocatechin gallate         | 3.55      | 457.0769           | C22H18O11     |
| 38  | Eriodictyol                      | 5.65      | 287.0554           | C15H12O6      |
| 39  | Eriodictyol-7-O-glucoside        | 4.50      | 449.1082           | C21H22O11     |
| 40  | Ferulic Acid                     | 4.72      | 193.0505           | C10H10O4      |
| 41  | Fisetin                          | 6.55      | 285.0397           | C15H10O6      |
| 42  | Flavin Adenine Dinucleotide      | 3.62      | 784.1497           | C27H33P2N9O15 |
| 43  | Formononetin                     | 7.61      | 267.0650           | C16H12O4      |
| 44  | Galangin                         | 10.3      | 269.0448           | C15H10O5      |
| 45  | Galanthamine Hydrobromide        | 0.84      | 286.1436           | C17H21NO3     |
| 46  | Gallic acid                      | 1.28      | 169.0135           | C7H6O5        |
| 47  | Genistein                        | 6.72      | 269.0448           | C15H10O5      |
| 48  | Genistin                         | 4.71      | 431.0976           | C21H20O10     |
| 49  | Gentisic acid                    | 3.55      | 153.0186           | C7H6O4        |
| 50  | Geraniol                         | 6.15      | 153.1272           | C10H18O       |
| 51  | Harmine Hydrochloride            | 8.48      | 211.0864           | C13H12N2O     |
| 52  | Hesperetin                       | 6.60      | 301.0710           | C16H14O6      |
| 53  | Hispidulin                       | 7.28      | 299.0554           | C16H12O6      |
| 54  | Homovanillic acid                | 3.96      | 181.0499           | C9H10O4       |
| 55  | Homovanillyl Alcohol             | 12.1      | 167.0712           | C9H12O3       |
| 56  | Humic Acid                       | 8.45      | 225.0138           | C9H8Na2O4     |

| No. | Compound ID                              | RT (min.) | [M-H] <sup>-</sup> | Formula    |
|-----|------------------------------------------|-----------|--------------------|------------|
| 57  | Hydrocinnamic acid                       | 6.08      | 149.0601           | C9H10O2    |
| 58  | Hydroxytyrosol                           | 2.85      | 153.0555           | C8H10O3    |
| 59  | Isoorientin                              | 4.51      | 447.092            | C21H20O11  |
| 60  | Isorhamnetin                             | 7.80      | 315.0503           | C16H12O7   |
| 61  | Kaempferol                               | 6.55      | 285.0397           | C15H10O6   |
| 62  | Lauric Acid                              | 11.3      | 199.1702           | C12H24O2   |
| 63  | Luteolin                                 | 6.55      | 285.0397           | C15H10O6   |
| 64  | Luteolin-7-O-β-D-Glucuronide             | 4.92      | 461.0718           | C21H18O12  |
| 65  | Malvidin Chloride                        | 5.86      | 365.0432           | C17H15O7   |
| 66  | Mannitol                                 | 0.85      | 181.0718           | C6H14O6    |
| 67  | Mescaline HCl                            | 8.48      | 210.1123           | C11H17NO3  |
| 68  | Morphine                                 | 7.28      | 284.1279           | C17H19NO3  |
| 69  | Myricetin                                | 5.45      | 317.0296           | C15H10O8   |
| 70  | Naringenin                               | 4.97      | 271.0605           | C15H12O5   |
| 71  | Oleuropein                               | 2.67      | 539.1770           | C25H32O13  |
| 72  | Orientin                                 | 4.51      | 447.0920           | C21H20O11  |
| 73  | o-Toluic Acid                            | 3.9       | 135.0439           | C8H8O2     |
| 74  | p-Coumaric acid                          | 6.37      | 163.0393           | C9H8O3     |
| 75  | Pelargonidin                             | 4.57      | 270.0526           | C15H11O5   |
| 76  | Pilocarpine Hydrochloride                | 8.48      | 207.1126           | C11H16N2O2 |
| 77  | Protocatechuic acid                      | 4.25      | 153.0186           | C7H6O4     |
| 78  | Pyrogallol                               | 1.46      | 125.0237           | C6H6O3     |
| 79  | Quercetin                                | 6.26      | 301.0347           | C15H10O7   |
| 80  | Quercetin-3-O-glucoside                  | 5.07      | 463.0875           | C21H20O12  |
| 81  | Quinic acid                              | 0.89      | 191.0554           | C7H12O6    |
| 82  | Quinidine Sulfate Dihydrate              | 5.86      | 647.3590           | C40H48N4O4 |
| 83  | Quinine Bisulfate                        | 4.71      | 323.1758           | C20H24N2O2 |
| 84  | Rhamnetin                                | 7.80      | 315.0503           | C16H12O7   |
| 85  | Rosmarinic acid                          | 5.19      | 359.0765           | C18H16O8   |
| 86  | Rutin                                    | 11.3      | 609.1454           | C27H30O16  |
| 87  | Salicylic acid                           | 5.43      | 137.0237           | C7H6O3     |
| 88  | Sinapic acid                             | 4.72      | 223.0605           | C11H12O5   |
| 89  | Syringic acid                            | 5.19      | 197.0448           | C9H10O5    |
| 90  | Tetracycline                             | 3.75      | 443.1453           | C22H24N2O8 |
| 91  | Tetrandrine                              | 5.76      | 621.2957           | C38H42N2O6 |
| 92  | Theobromine                              | 3.20      | 179.0562           | C7H8N4O2   |
| 93  | Theophylline                             | 3.31      | 179.0562           | C7H8N4O2   |
| 94  | Thymol                                   | 11.9      | 149.2096           | C10H14O    |
| 95  | Tomatidine (hydrochloride)               | 9.25      | 414.3365           | C27H45NO2  |
| 96  | trans-Ferulic acid                       | 4.72      | 193.0494           | C10H10O4   |
| 97  | trans-Aconitic acid                      | 1.15      | 173.0084           | C6H6O6     |
| 98  | Tryptamine                               | 14.3      | 159.0915           | C10H12N2   |
| 99  | Tubocurarine Hydrochloride Penta-hydrate | 4.57      | 609.2963           | C37H42N2O6 |
| 100 | Tyramine Hydrochloride                   | 1.07      | 136.0755           | C8H11NO    |
| 101 | Urolithin A                              | 5.96      | 227.0343           | C13H8O4    |
| 102 | Urolithin B                              | 7.03      | 211.0393           | C13H8O3    |
| 103 | Urolithin C                              | 6.59      | 243.0292           | C13H8O5    |
| 104 | Vanillin                                 | 4.28      | 151.0393           | C8H8O3     |
| 105 | Vitexin                                  | 4.71      | 431.0976           | C21H20O10  |

**Supplementary Table 2 |** Authentic compound standards used for the identification of plant-derived compounds in bone extracts.

| Compound                      | Formula       | RT (min) | m/z ppm error | Percentage adsorption to HAP | Standard error percentage |
|-------------------------------|---------------|----------|---------------|------------------------------|---------------------------|
| Carmine                       | C22H20O13     | 2.29     | 2.4843        | 100                          | 3.02                      |
| Chlorogenic acid              | C16H18O9      | 1.89     | 1.92587       | 99                           | 0.74                      |
| Flavin Adenine Dinucleotide   | C27H33N9O15P2 | 6.31     | 2.49952       | 99                           | 5.57                      |
| Chicoric acid                 | C22H18O12     | 2.67     | -0.42277      | 99                           | 8.84                      |
| Quinic acid                   | C7H12O6       | 0.93     | 1.04681       | 97                           | 1.53                      |
| trans-Aconitic acid           | C6H6O6        | 1.04     | 2.08081       | 92                           | 3.09                      |
| Tetracycline                  | C22H24N2O8    | 1.96     | -0.11283      | 89                           | 1.61                      |
| Mannitol                      | C6H14O6       | 0.85     | 1.98816       | 87                           | 2.67                      |
| Luteolin-7-O-β-D-Glucuronide  | C21H18O12     | 2.5      | -0.5639       | 78                           | 5.60                      |
| Orientin                      | C21H20O11     | 2.19     | 0.62627       | 76                           | 4.17                      |
| p-Coumaric acid               | C9H8O3        | 2.42     | 0.49068       | 58                           | 3.44                      |
| Quercetin-3-O-glucoside       | C21H20O12     | 2.56     | -0.06478      | 56                           | 6.21                      |
| Ellagic acid                  | C14H6O8       | 2.71     | -0.09834      | 52                           | 2.41                      |
| Rutin                         | C27H30O16     | 2.67     | 0.68604       | 52                           | 7.08                      |
| Urolithin A                   | C13H8O4       | 2.94     | 1.06592       | 52                           | 7.87                      |
| Rosmarinic acid               | C18H16O8      | 2.59     | 0.25259       | 49                           | 7.13                      |
| Protocatechuic acid           | C7H6O4        | 2.85     | 2.10431       | 47                           | 2.22                      |
| Vitexin                       | C21H20O10     | 3.48     | 1.29901       | 47                           | 6.90                      |
| Benzoic acid                  | C7H6O2        | 2.82     | 4.40141       | 46                           | 12.03                     |
| Oleuropein                    | C25H32O13     | 2.67     | 0.93494       | 46                           | 5.47                      |
| Isoorientin                   | C21H20O11     | 2.37     | -0.43705      | 46                           | 3.83                      |
| Epigallocatechin gallate      | C22H18O11     | 4.13     | 0.53492       | 45                           | 3.85                      |
| trans-Ferulic acid            | C10H10O4      | 2.45     | 1.46127       | 44                           | 4.61                      |
| Hydrocinnamic acid            | C9H10O2       | 3.06     | 3.8434        | 43                           | 9.69                      |
| Apigenin-7-O-neohesperidoside | C27H30O14     | 2.77     | 3.3244        | 42                           | 1.33                      |
| Alizarin                      | C14H8O4       | 3.56     | -0.28448      | 40                           | 3.20                      |
| Gentisic acid                 | C7H6O4        | 2.17     | 2.88852       | 39                           | 2.31                      |
| Eriodictyol-7-O-glucoside     | C21H22O11     | 2.4      | 0.98996       | 39                           | 1.05                      |
| Lauric Acid                   | C12H24O2      | 4.34     | 2.87844       | 33                           | 7.09                      |
| Syringic acid                 | C9H10O5       | 2.29     | 1.55649       | 33                           | 1.27                      |
| Capsaicin                     | C18H27NO3     | 3.61     | 0.35175       | 29                           | 8.67                      |
| Caffeic acid                  | C9H8O4        | 2.18     | 4.8147        | 23                           | 5.82                      |
| Salicylic acid                | C7H6O3        | 2.9      | 4.06789       | 22                           | 3.26                      |
| Urolithin C                   | C13H8O5       | 2.67     | 0.19175       | 22                           | 4.25                      |
| o-Toluic Acid                 | C8H8O2        | 3.07     | 2.61246       | 20                           | 6.97                      |
| Amentoflavone                 | C30H18O10     | 3.39     | 4.35668       | 20                           | 7.41                      |
| Baicalein                     | C15H10O5      | 3.33     | -0.16094      | 20                           | 1.72                      |
| Fisetin                       | C15H10O6      | 5.65     | 0.07473       | 17                           | 2.90                      |
| Ferulic Acid                  | C10H10O4      | 2.47     | 0.01088       | 17                           | 1.59                      |
| Sinapic acid                  | C11H12O5      | 2.45     | 0.29902       | 17                           | 2.29                      |
| Hesperetin                    | C16H14O6      | 3.24     | 2.39611       | 16                           | 8.33                      |
| Luteolin                      | C15H10O6      | 3.07     | 2.88135       | 15                           | 0.80                      |
| Ajmalicine                    | C21H24N2O3    | 2.44     | 1.89622       | 15                           | 5.14                      |
| Myricetin                     | C15H10O8      | 2.74     | 3.12431       | 14                           | 3.57                      |
| Isorhamnetin                  | C16H12O7      | 3.25     | 1.35184       | 13                           | 1.87                      |
| Pyrogallol                    | C6H6O3        | 1.63     | 2.13798       | 12                           | 0.82                      |
| Kaempferol                    | C15H10O6      | 3.21     | -0.38135      | 12                           | 1.65                      |
| Catechin hydrate              | C15H14O6      | 1.8      | 0.35078       | 9                            | 4.88                      |
| Rhamnetin                     | C16H12O7      | 3.4      | 0.20917       | 8                            | 3.72                      |
| Gallic acid                   | C7H6O5        | 1.08     | 1.28155       | 6                            | 3.12                      |
| Hispidulin                    | C16H12O6      | 3.28     | 1.40877       | 5                            | 1.64                      |
| Eriodictyol                   | C15H12O6      | 2.82     | 0.59675       | 5                            | 2.99                      |
| Urolithin B                   | C13H8O3       | 3.4      | 1.1249        | 4                            | 1.98                      |
| Chrysin                       | C15H10O4      | 3.63     | 2.77454       | 3                            | 2.86                      |
| Vanillin                      | C8H8O3        | 2.34     | 0.57865       | 2                            | 3.36                      |
| Galangin                      | C15H10O5      | 4.17     | 1.47447       | 2                            | 0.95                      |

**Supplementary Table 3 | Shows the extent to which a wide range of polyphenols bind to hydroxyapatite (HAP), the mineral component of bone.** 100% binding (carmine for example) was determined by complete loss of detectable polyphenol when mixed with HAP (from a standard solution concentration/weight of HAP). The results show that there is variability from 100% to 0% binding. No strong structural or chemical patterns were observed to be associated with strong binding, however, multiple adjacent hydroxyl groups on a single ring with a single or

| Acorns [%] in the diet            | 0 %   | 50 % |
|-----------------------------------|-------|------|
| Chemical composition of the diets |       |      |
| Dry matter [g/kg, as fed]         | 890   | 751  |
| Crude ash [g/kg DM]               | 68.5  | 58.6 |
| Crude protein [g/kg DM]           | 175   | 116  |
| Crude fibre [g/kg DM]             | 45.0  | 95   |
| Starch [g/kg DM]                  | 390   | 410  |
| Tannic acid equivalent [g/kg DM]  | <1.0* | 25.8 |
| Dry matter [g/kg, as fed]         | 890   | 751  |

**Supplementary Table 4** | The chemical composition of Sardinia experimental diets. \*below limit of detection.

| Parameters                                           | Weeks of feeding | Growers   | Finishers |
|------------------------------------------------------|------------------|-----------|-----------|
| (n. animals)                                         | 4                | 3         | 2         |
| BM at slaughter (kg)                                 |                  | 5.40±0.25 | 127±2.80  |
| DM intake (g*kg BM <sup>-1</sup> d <sup>-1</sup> )   |                  | 66.5±0.80 | 23.6±1.72 |
| TAE intake (mg*kg BM <sup>-1</sup> d <sup>-1</sup> ) |                  | 1717±13   | 610±0.01  |
| (n. animals)                                         | 4                | 3         | 2         |
| BM at slaughter (kg)                                 |                  | 5.40±0.25 | 127±2.80  |
| DM intake (g*kg BM <sup>-1</sup> d <sup>-1</sup> )   |                  | 66.5±0.80 | 23.6±1.72 |

**Supplementary Table 5 |** Average daily intakes of dry matter (DM) and tannic acid equivalent (TAE) ( $M \pm SE$ ) in acorn fed pigs involved in the Sardinian pig feeding experimental trial.
